# Supplementary material for: Adversity in childhood is linked to mental and physical health throughout life
Source: PubMed Central journal article supplement — BMJ. 2020 Oct 28;371:m3048. doi: 10.1136/bmj.m3048 (PMC7592151; doi:10.1136/bmj.m3048), 2020-10-28
Supplement: chan059150.ww1.pdf [file chan059150.ww1.pdf]

# From bitter experience

Lifelong implications of adverse childhood experiences

Today's youth face challenges unforeseen in previous generations. Adversity in the first years of life may deleteriously affect the course of human development. This graphic presents some of these challenges and introduces the biological and psychological mechanisms by which they can affect health throughout a child's development and journey into adulthood

## Context

Each child's situation is unique, and their particular circumstances can have an important impact on how they are affected by their experiences

- Type of adversity
- Duration of adversity
- Number of adversities
- Interactions between adversities
- Timing and developmental status
- Child's temperament and reaction to adversity
- Pre-existing characteristics
- Family environment
- Health status and comorbidities

Health problems that have been observed more commonly in people that have experienced adversity in childhood

| Examples of physical impacts          | Examples of behavioural impacts             |
|---------------------------------------|---------------------------------------------|
| Somatic symptoms                      | Learning and/or behavioural problems        |
| Headaches                             | Early use of illicit drugs                  |
| Poor dental health                    | High school absenteeism                     |
| Asthma                                | Early use of alcohol                        |
| Allergies                             | Attention deficit hyperactivity disorder    |
| Increased infections                  |                                             |
| Chronic obstructive pulmonary disease | Suicide attempts                            |
| Somatic symptoms                      | Cannabis use                                |
| Skeletal fracture                     | Suicidal ideation                           |
| Hepatitis or jaundice                 | Injected drug, crack cocaine, or heroin use |
| Cancer                                | Violence perpetration                       |
| Cardiovascular disease                | Violence victimisation                      |

## The way forward

In their BMJ analysis article, Nelson and co-authors explain their recommendations for policy and research in this area, including:

- Development of new metrics
- Implementation of evidence-informed policies
- More individualized research
- A range of interventions at all stages of childhood

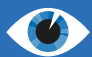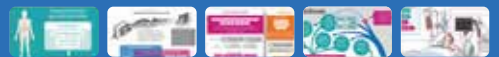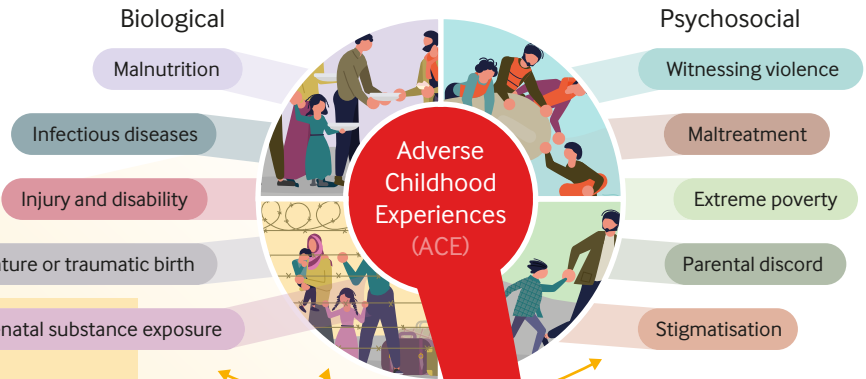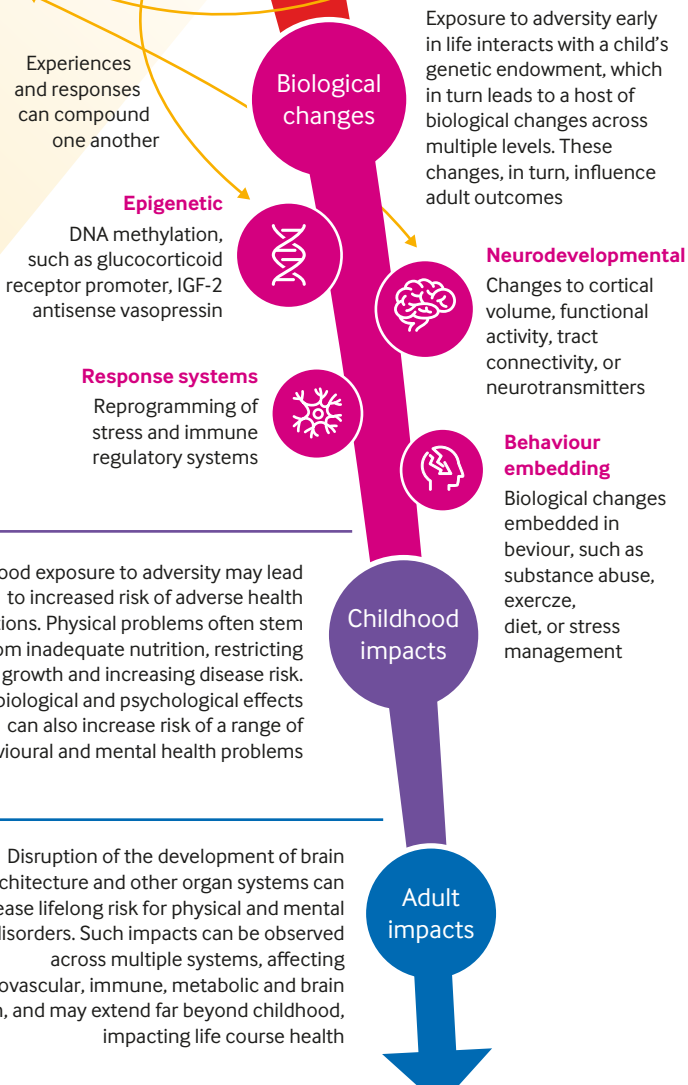

Childhood exposure to adversity may lead to increased risk of adverse health conditions. Physical problems often stem from inadequate nutrition, restricting growth and increasing disease risk. Neurobiological and psychological effects can also increase risk of a range of behavioural and mental health problems

Disruption of the development of brain architecture and other organ systems can increase lifelong risk for physical and mental disorders. Such impacts can be observed across multiple systems, affecting cardiovascular, immune, metabolic and brain health, and may extend far beyond childhood, impacting life course health
